# Supplementary material
Source: PubMed Central journal article supplement (PMC4295381)
Supplement: MCB.00945-14_zmb999100690so1.pdf [file MCB.00945-14_zmb999100690so1.pdf]

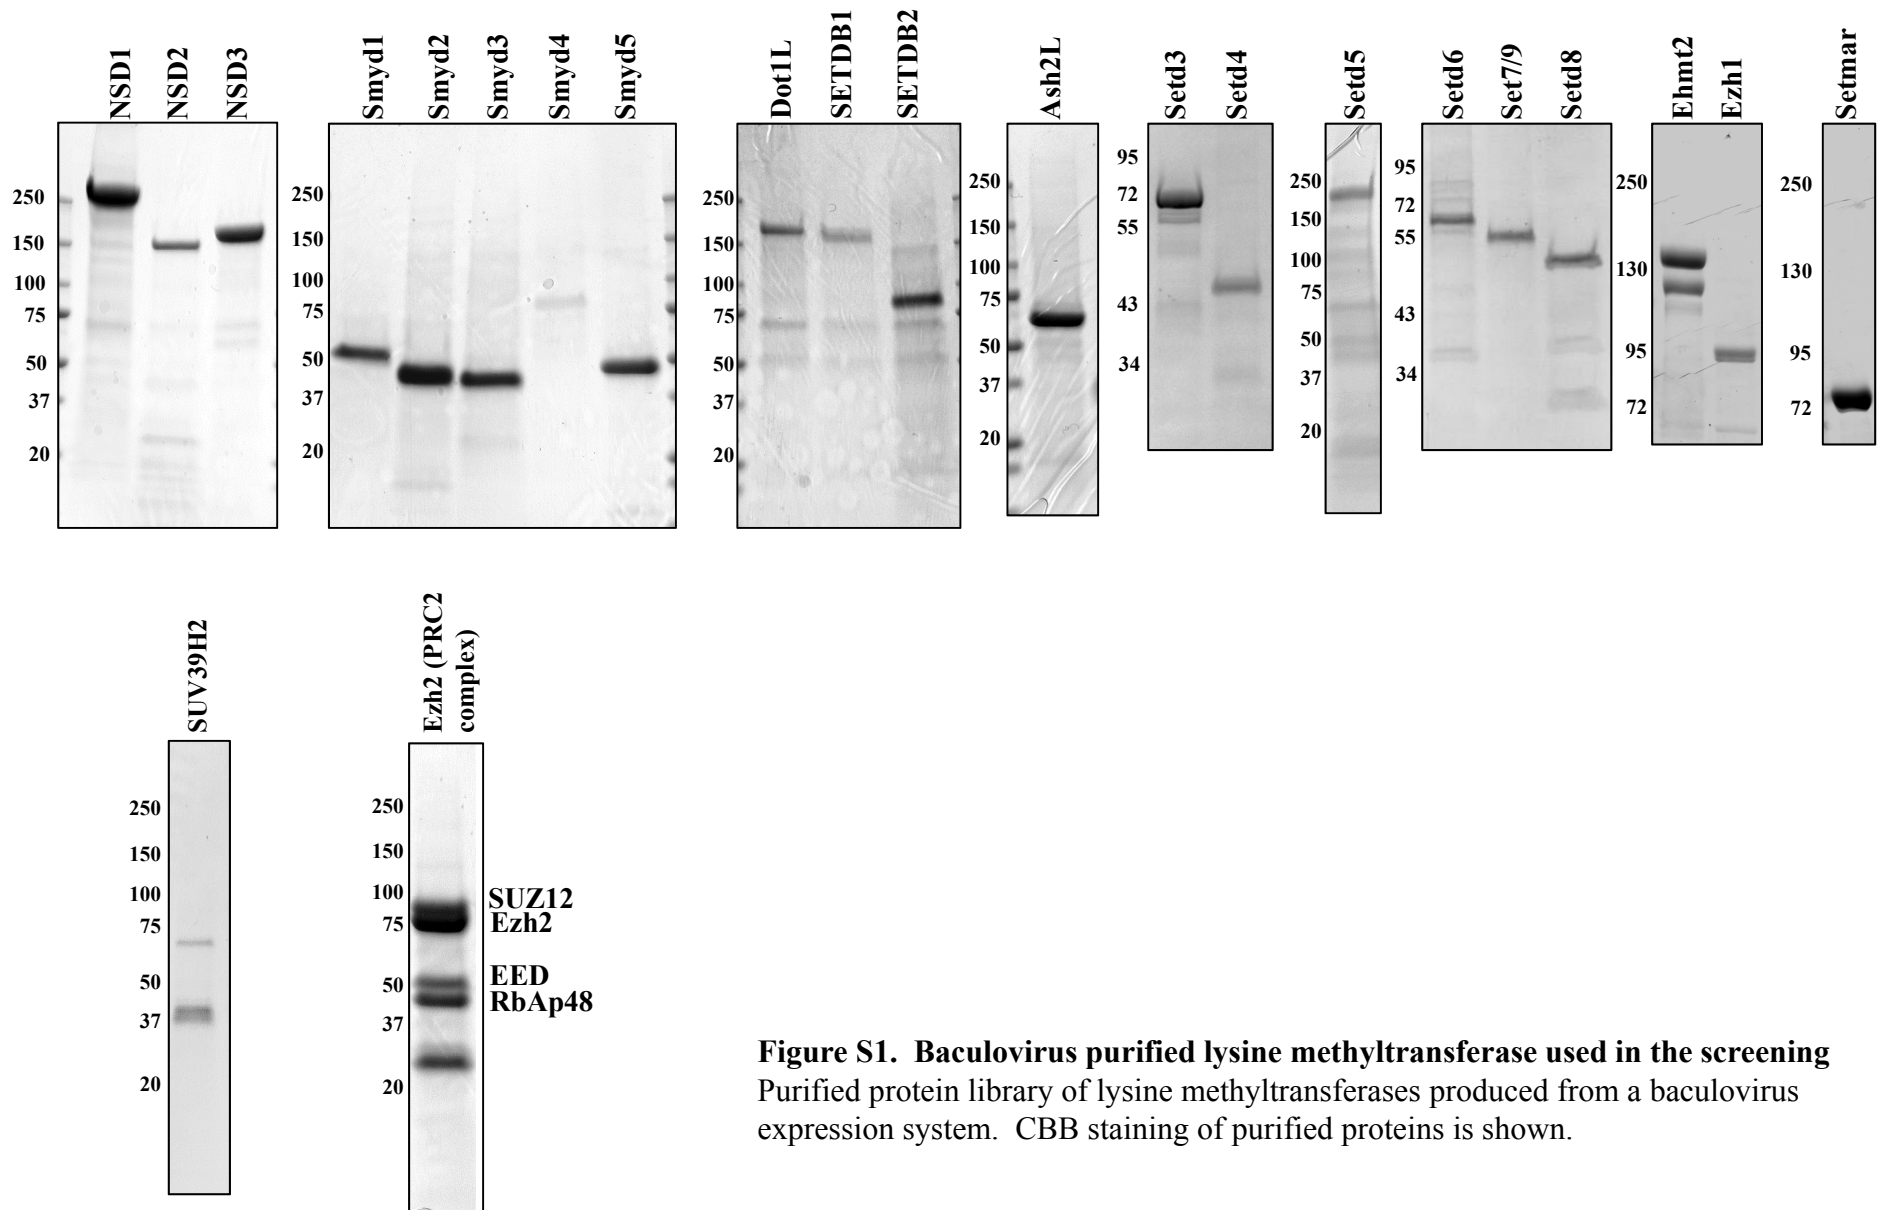

**Figure S1. Baculovirus purified lysine methyltransferase used in the screening**  
 Purified protein library of lysine methyltransferases produced from a baculovirus expression system. CBB staining of purified proteins is shown.
